# Supplementary material for: Tidal variability of nutrients in a coastal coral reef system influencedby groundwater
Source: Copernicus journal article supplement (doi:10.5194/bg-2017-156), 2017-05-08
Supplement: Supplementary file 1 [file bg-2017-156-supplement.pdf]

Table S1. Data collected in the time-series investigation at the coral reef Station CT (latitude: 18.2124; longitude: 109.4744) in Sanva Bay in February 6-13, 2012.

| Sampling time   | Depth  | Nutrients |         |         |           |          | <sup>228</sup> Ra |                        |                   |
|-----------------|--------|-----------|---------|---------|-----------|----------|-------------------|------------------------|-------------------|
|                 |        | Salinity  | Nitrite | Nitrate | Phosphate | Silicate | NO <sub>x</sub>   | Sampling time          | <sup>228</sup> Ra |
| yyyy-mm-dd      | m      |           |         |         | μM        |          | yyyy-mm-dd        | dpm 100L <sup>-1</sup> |                   |
| 2012/2/6 15:13  | 1.2611 | 33.62     | 0.247   | 0.547   | 0.132     | 5.904    | 0.794             | 2012/2/6 15:16         | 27.75             |
| 2012/2/6 17:58  | 1.6264 | 33.61     | 0.347   | 1.373   | 0.217     | 6.056    | 1.720             | 2012/2/6 18:10         | 29.77             |
| 2012/2/6 21:00  | 2.0078 | 33.65     | 0.354   | 0.673   | 0.130     | 5.871    | 1.027             | 2012/2/6 21:02         | 26.26             |
| 2012/2/7 0:00   | 1.7891 | 33.65     | 0.349   | 0.611   | 0.110     | 5.934    | 0.960             | 2012/2/6 23:55         | 27.02             |
| 2012/2/7 3:00   | 1.1051 | 33.60     | 0.235   | 0.642   | 0.148     | 5.777    | 0.877             | 2012/2/7 3:02          | 26.27             |
| 2012/2/7 6:02   | 0.7047 | 33.50     | 0.107   | 0.880   | 0.181     | 5.113    | 0.987             | 2012/2/7 6:04          | 35.23             |
| 2012/2/7 8:00   | 0.8203 | 33.47     | 0.124   | 0.958   | 0.181     | 5.564    | 1.082             | 2012/2/7 8:02          | 38.74             |
| 2012/2/7 10:00  | 1.0194 | 33.50     | 0.191   | 1.202   | 0.204     | 6.338    | 1.393             | 2012/2/7 10:00         | 36.31             |
| 2012/2/7 12:02  | 1.1363 | 33.57     | 0.227   | 1.440   | 0.194     | 6.375    | 1.667             | 2012/2/7 12:04         | 33.28             |
| 2012/2/7 14:00  | 1.1286 | 33.59     | 0.194   | 1.071   | 0.186     | 7.019    | 1.265             | 2012/2/7 14:02         | 41.35             |
| 2012/2/7 15:57  | 1.1476 | 33.62     | 0.162   | 0.972   | 0.219     | 6.842    | 1.134             | 2012/2/7 16:00         | 22.96             |
| 2012/2/7 18:00  | 1.4370 | 33.63     | 0.158   | 1.912   | 0.160     | 5.888    | 2.070             | 2012/2/7 18:05         | 13.98             |
| 2012/2/7 20:00  | 1.8260 | 33.65     | 0.266   | 0.370   | 0.110     | 6.174    | 0.636             | 2012/2/7 20:02         | 16.90             |
| 2012/2/7 22:00  | 2.0721 | 33.64     | 0.248   | 0.447   | 0.100     | 5.894    | 0.695             | 2012/2/7 22:02         | 26.01             |
| 2012/2/8 0:00   | 1.9841 | 33.63     | 0.245   | 0.449   | 0.107     | 5.839    | 0.694             | 2012/2/8 0:02          | 26.29             |
| 2012/2/8 2:00   | 1.5808 | 33.63     | 0.282   | 0.500   | 0.124     | 6.122    | 0.782             | 2012/2/8 2:06          | 31.68             |
| 2012/2/8 4:05   | 1.0926 | 33.61     | 0.264   | 0.912   | 0.135     | 5.616    | 1.176             | 2012/2/8 4:04          | 29.67             |
| 2012/2/8 5:58   | 0.8167 | 33.63     | 0.155   | 0.744   | 0.168     | 5.207    | 0.899             | 2012/2/8 6:02          | 39.86             |
| 2012/2/8 9:00   | 1.0519 | 33.49     | 0.175   | 1.342   | 0.196     | 7.135    | 1.517             | 2012/2/8 9:00          | 45.28             |
| 2012/2/8 12:00  | 1.3462 | 33.64     | 0.199   | 0.830   | 0.139     | 6.882    | 1.029             | 2012/2/8 12:01         | 33.78             |
| 2012/2/8 15:00  | 1.2829 | 33.61     | 0.163   | 0.774   | 0.196     | 6.094    | 0.937             | 2012/2/8 14:58         | 35.32             |
| 2012/2/8 18:00  | 1.4010 | 33.63     | 0.406   | 1.010   | 0.189     | 5.424    | 1.416             | 2012/2/8 18:02         | 29.62             |
| 2012/2/8 21:05  | 1.9859 | 33.67     | 0.583   | 0.710   | 0.135     | 4.898    | 1.293             | 2012/2/8 21:02         | 25.60             |
| 2012/2/9 0:00   | 2.1465 | 33.66     | 0.623   | 0.682   | 0.133     | 5.485    | 1.305             | 2012/2/9 0:02          | 32.32             |
| 2012/2/9 3:00   | 1.6791 | 33.57     | 0.615   | 0.806   | 0.139     | 5.110    | 1.421             | 2012/2/9 3:02          | 27.23             |
| 2012/2/9 6:00   | 1.0887 | 33.58     | 0.363   | 0.980   | 0.162     | 4.678    | 1.343             | 2012/2/9 6:02          | 27.21             |
| 2012/2/9 9:00   | 1.2258 | 33.57     | 0.320   | 1.121   | 0.170     | 4.988    | 1.441             | 2012/2/9 9:02          | 29.05             |
| 2012/2/9 12:00  | 1.5989 | 33.45     | 0.321   | 1.083   | 0.159     | 7.251    | 1.404             | 2012/2/9 12:02         | 38.82             |
| 2012/2/9 15:02  | 1.4530 | 33.60     | 0.367   | 0.957   | 0.152     | 5.462    | 1.324             | 2012/2/9 15:02         | 27.94             |
| 2012/2/9 18:04  | 1.3926 | 33.59     | 0.405   | 1.088   | 0.170     | 5.248    | 1.493             | 2012/2/9 18:02         | 29.28             |
| 2012/2/9 21:00  | 1.8400 | 33.57     | 0.541   | 1.069   | 0.146     | 4.588    | 1.610             | 2012/2/9 21:02         | 25.63             |
| 2012/2/10 0:00  | 2.0494 | 33.65     | 0.712   | 0.803   | 0.133     | 4.570    | 1.515             | 2012/2/10 0:02         | 24.32             |
| 2012/2/10 3:00  | 1.6602 | 33.65     | 0.741   | 0.837   | 0.129     | 5.205    | 1.578             | 2012/2/10 3:04         | 23.71             |
| 2012/2/10 6:08  | 1.0035 | 33.65     | 0.563   | 0.980   | 0.140     | 4.740    | 1.543             | 2012/2/10 6:06         | 25.62             |
| 2012/2/10 9:05  | 1.1413 | 33.64     | 0.420   | 1.026   | 0.146     | 5.047    | 1.446             | 2012/2/10 9:06         | 25.31             |
| 2012/2/10 12:00 | 1.5075 | 33.63     | 0.488   | 0.927   | 0.141     | 5.043    | 1.415             | 2012/2/10 12:02        | 27.62             |
| 2012/2/10 15:00 | 1.3977 | 33.64     | 0.623   | 0.911   | 0.149     | 5.282    | 1.534             | 2012/2/10 15:02        | 25.97             |
| 2012/2/10 18:05 | 1.1377 | 33.65     | 0.396   | 1.162   | 0.164     | 4.553    | 1.558             | 2012/2/10 18:10        | 23.99             |
| 2012/2/10 21:10 | 1.4732 | 33.65     | 0.445   | 1.317   | 0.178     | 4.699    | 1.762             | 2012/2/10 21:12        | 24.69             |
| 2012/2/11 0:05  | 1.8800 | 33.647    | 0.546   | 0.942   | 0.142     | 5.589    | 1.488             | 2012/2/11 0:05         | 29.02             |
| 2012/2/11 3:11  | 1.7242 | 33.65     | 0.616   | 0.711   | 0.106     | 4.537    | 1.327             | 2012/2/11 3:12         | 23.88             |
| 2012/2/11 6:02  | 1.2086 | 33.64     | 0.516   | 0.787   | 0.117     | 4.521    | 1.303             | 2012/2/11 6:03         | 22.84             |
| 2012/2/11 9:05  | 1.1170 | 33.598    | 0.364   | 0.948   | 0.129     | 4.500    | 1.312             | 2012/2/11 9:08         | 25.75             |
| 2012/2/11 12:10 | 1.5433 | 33.595    | 0.381   | 0.867   | 0.129     | 4.731    | 1.248             | 2012/2/11 12:02        | 27.36             |
| 2012/2/11 15:03 | 1.5057 | 33.591    | 0.477   | 0.787   | 0.128     | 5.330    | 1.264             | 2012/2/11 15:03        | 25.50             |
| 2012/2/11 18:00 | 1.1649 | 33.622    | 0.319   | 0.928   | 0.132     | 4.511    | 1.247             | 2012/2/11 18:02        | 31.28             |
| 2012/2/11 20:00 | 1.1295 | 33.616    | 0.275   | 1.061   | 0.130     | 4.021    | 1.336             | 2012/2/11 22:03        | 29.07             |
| 2012/2/11 22:00 | 1.4023 | 33.571    | 0.425   | 1.031   | 0.153     | 5.305    | 1.456             | 2012/2/12 0:02         | 27.12             |
| 2012/2/12 0:00  | 1.7078 | 33.625    | 0.573   | 0.754   | 0.125     | 4.921    | 1.327             | 2012/2/12 2:02         | 24.14             |
| 2012/2/12 2:00  | 1.8072 | 33.662    | 0.542   | 0.555   | 0.103     | 4.345    | 1.097             | 2012/2/12 4:02         | 24.95             |
| 2012/2/12 4:00  | 1.6096 | 33.659    | 0.573   | 0.526   | 0.100     | 4.981    | 1.099             | 2012/2/12 6:02         | 26.16             |
| 2012/2/12 7:58  | 1.1778 | 33.654    | 0.366   | 0.635   | 0.102     | 4.592    | 1.001             | 2012/2/12 7:58         | 22.51             |
| 2012/2/12 10:00 | 1.3227 | 33.635    | 0.260   | 0.439   | 0.102     | 4.174    | 0.699             | 2012/2/12 10:02        | 22.17             |
| 2012/2/12 12:00 | 1.6063 | 33.623    | 0.255   | 0.394   | 0.096     | 4.434    | 0.649             | 2012/2/12 12:03        | 26.86             |
| 2012/2/12 13:58 | 1.8009 | 33.630    | 0.262   | 0.369   | 0.092     | 4.134    | 0.631             | 2012/2/12 13:59        | 26.02             |
| 2012/2/12 16:00 | 1.6299 | 33.630    | 0.228   | 0.272   | 0.084     | 3.954    | 0.500             | 2012/2/12 16:02        | 25.04             |
| 2012/2/12 18:00 | 1.3690 | 33.639    | 0.197   | 0.303   | 0.086     | 4.009    | 0.500             | 2012/2/12 18:00        | 24.66             |
| 2012/2/12 20:03 | 1.1454 | 33.637    | 0.118   | 0.396   | 0.101     | 3.133    | 0.514             | 2012/2/12 20:02        | 29.72             |
| 2012/2/12 22:00 | 1.2353 | 33.630    | 0.123   | 0.406   | 0.104     | 2.894    | 0.529             | 2012/2/12 22:02        | 32.72             |
| 2012/2/13 0:00  | 1.4703 | 33.574    | 0.403   | 0.578   | 0.111     | 4.486    | 0.981             | 2012/2/13 0:02         | 29.42             |
| 2012/2/13 3:00  | 1.6848 | 33.615    | 0.321   | 0.397   | 0.112     | 3.486    | 0.718             | 2012/2/13 3:01         | 27.13             |
| 2012/2/13 6:00  | 1.3632 | 33.637    | 0.335   | 0.405   | 0.090     | 3.662    | 0.740             | 2012/2/13 6:04         | 24.37             |
